# Supplementary material for: Origin and Function of Amino Acids in Nectar and Nectaries of Pitcairnia Species with Particular Emphasis on Alanine and Glutamine
Source: MDPI journal article supplement (doi:10.3390/plants13010023), 2023-12-20
Supplement: s1 [file s1]

## Supplementary Material

# Origin and function of amino acids in nectar and nectaries of *Pitcairnia* species with particular emphasis on alanine and glutamine

Author: Thomas Göttlinger\*, Gertrud Lohaus

\*Correspondence: Thomas Göttlinger (goettlinger@uni-wuppertal.de)

Supplementary Table S1: Main features of all examined *Pitcairnia* species.

| Species                                            | Botanical garden | Main pollinator | Inflorescence type | Flower length [cm] | Floral bracts | Flower sepal | Flower petal | Group                       | Leaf samples | Nectary samples | Nectar samples | Enzyme assay |
|----------------------------------------------------|------------------|-----------------|--------------------|--------------------|---------------|--------------|--------------|-----------------------------|--------------|-----------------|----------------|--------------|
| <i>P. albolutea</i>                                | Berlin           | tro             | spike              | 8.0                | greenish      | yellow       | white        | yellow/white sepals& petals | ✓            | ✓               | ✓              | -            |
| <i>P. altensteinii</i><br><i>var. altensteinii</i> | Berlin           | tro             | spike              | 5.5                | yellow        | yellow       | white        | yellow/white sepals& petals | ✓            | -               | ✓              | -            |
| <i>P. angustifolia</i>                             | Berlin           | tro             | raceme             | 5.5                | greenish      | reddish      | reddish      | reddish sepals & petals     | ✓            | ✓               | ✓              | ✓            |
| <i>P. atrorubens</i>                               | Heidelberg       | tro             | spike              | 4.0                | reddish       | yellow       | yellow       | reddish bracts              | ✓            | -               | ✓              | -            |
| <i>P. breedlovei</i>                               | Heidelberg       | tro             | raceme             | 5.0                | reddish       | yellow       | yellow       | yellow/white sepals& petals | ✓            | -               | ✓              | -            |
| <i>P. bromeliifolia</i>                            | Berlin           | tro             | raceme             | 4.5                | reddish       | reddish      | reddish      | reddish sepals & petals     | ✓            | -               | ✓              | -            |
| <i>P. capixaba</i>                                 | Berlin           | tro             | raceme             | 6.5                | greenish      | yellow       | white        | yellow/white sepals& petals | ✓            | ✓               | ✓              | ✓            |
| <i>P. carnososepala</i>                            | Berlin           | tro             | raceme             | 7.5                | reddish       | reddish      | reddish      | reddish sepals & petals     | ✓            | -               | ✓              | -            |
| <i>P. chiapensis</i>                               | Berlin           | tro             | raceme             | 5.0                | greenish      | yellow       | yellow       | yellow/white sepals& petals | ✓            | -               | ✓              | -            |
| <i>P. chiriquensis</i>                             | Berlin           | tro             | panicle            | 4.5                | reddish       | reddish      | reddish      | reddish sepals & petals     | ✓            | -               | ✓              | -            |
| <i>P. corallina</i>                                | Berlin           | tro             | raceme             | 7.0                | reddish       | reddish      | reddish      | reddish sepals & petals     | ✓            | -               | ✓              | -            |
| <i>P. echinata</i><br><i>var. vallisensis</i>      | Berlin           | tro             | panicle            | 4.5                | greenish      | reddish      | reddish      | reddish sepals & petals     | ✓            | -               | ✓              | -            |
| <i>P. flagellaris</i>                              | Berlin           | tro             | spike              | 6.5                | reddish       | yellow       | yellow       | reddish bracts              | ✓            | -               | ✓              | -            |
| <i>P. imbricata</i>                                | Stuttgart        | tro             | spike              | 5.0                | reddish       | yellow       | yellow       | reddish bracts              | ✓            | ✓               | ✓              | ✓            |

|                                   |            |     |         |     |          |          |         |                                |   |   |   |   |
|-----------------------------------|------------|-----|---------|-----|----------|----------|---------|--------------------------------|---|---|---|---|
| <i>P. integrifolia</i>            | Berlin     | tro | raceme  | 4.0 | greenish | reddish  | reddish | reddish sepals & petals        | ✓ | ✓ | ✓ | - |
| <i>P. jimenezii</i>               | Heidelberg | tro | raceme  | 5.0 | greenish | reddish  | reddish | reddish sepals & petals        | ✓ | - | ✓ | - |
| <i>P. longisimiflora</i>          | Berlin     | chi | raceme  | 9.5 | greenish | greenish | white   | greenish/white sepals & petals | ✓ | ✓ | ✓ | ✓ |
| <i>P. maidifolia</i>              | Stuttgart  | tro | spike   | 5.0 | reddish  | white    | white   | reddish bracts                 | ✓ | ✓ | ✓ | ✓ |
| <i>P. nigra</i> var. <i>nigra</i> | Berlin     | tro | spike   | 8.0 | reddish  | reddish  | reddish | reddish sepals & petals        | ✓ | ✓ | ✓ | - |
| <i>P. oliva-estevae</i>           | Berlin     | tro | spike   | 5.0 | reddish  | reddish  | white   | reddish bracts                 | ✓ | ✓ | ✓ | ✓ |
| <i>P. orchidifolia</i>            | Berlin     | tro | raceme  | 4.5 | greenish | reddish  | reddish | reddish sepals & petals        | ✓ | - | ✓ | - |
| <i>P. poeppigiana</i>             | Berlin     | tro | spike   | 7.0 | greenish | reddish  | reddish | reddish sepals & petals        | ✓ | ✓ | ✓ | ✓ |
| <i>P. recurvata</i>               | Berlin     | chi | spike   | 7.0 | greenish | greenish | white   | greenish/white sepals & petals | ✓ | ✓ | ✓ | - |
| <i>P. rubronigriflora</i>         | Berlin     | tro | raceme  | 4.5 | reddish  | reddish  | reddish | reddish sepals & petals        | ✓ | - | ✓ | - |
| <i>P. sceptrigera</i>             | Berlin     | tro | spike   | 6.5 | greenish | yellow   | yellow  | yellow/white sepals & petals   | ✓ | ✓ | ✓ | ✓ |
| <i>P. spicata</i>                 | Heidelberg | tro | spike   | 5.0 | reddish  | reddish  | reddish | reddish sepals & petals        | ✓ | - | ✓ | - |
| <i>P. sprucei</i>                 | Berlin     | tro | raceme  | 5.5 | reddish  | reddish  | reddish | reddish sepals & petals        | ✓ | - | ✓ | - |
| <i>P. suaveolens</i>              | Berlin     | tro | raceme  | 5.0 | greenish | yellow   | white   | yellow/white sepals & petals   | ✓ | - | ✓ | - |
| <i>P. utcubambensis</i>           | Berlin     | tro | panicle | 4.0 | reddish  | reddish  | reddish | reddish sepals & petals        | ✓ | - | ✓ | - |
| <i>P. wendlandii</i>              | Berlin     | tro | spike   | 5.5 | reddish  | yellow   | yellow  | reddish bracts                 | ✓ | ✓ | ✓ | ✓ |

tro = trochilophilous; chi = chiropterophilous

**Supplementary Table S2:** Results of the PERMANOVA and PERMDISP of three component groups: (A) amino acids, (B) sugars and inorganic ions, (C) Alanine. Data on leaves, nectaries, and nectar of four *Pitcairnia* species with red flowers or bracts and four *Pitcairnia* species with yellow/white or greenish/white flowers were used for the calculations. The significance level (\*) for both methods is  $p \leq 0.001$ .

|                                   | Degrees of Freedom (df) | Pseudo-F (F) | R <sup>2</sup> | PERMANOVA <i>p</i> -value | PERMDISP <i>p</i> -value |
|-----------------------------------|-------------------------|--------------|----------------|---------------------------|--------------------------|
| <b>(A) Amino acids</b>            |                         |              |                |                           |                          |
| Flower colour                     | 1                       | 29.95        | 0.58           | 0.001 *                   | 0.001                    |
| Residuals                         | 22                      |              | 0.42           |                           |                          |
| Total                             | 23                      |              | 1.00           |                           |                          |
| <b>(B) Sugars, inorganic ions</b> |                         |              |                |                           |                          |
| Flower colour                     | 1                       | 7.68         | 0.26           | 0.001 *                   | 0.007                    |
| Residuals                         | 22                      |              | 0.74           |                           |                          |
| Total                             | 23                      |              | 1.00           |                           |                          |
| <b>(C) Alanine</b>                |                         |              |                |                           |                          |
| Flower colour                     | 1                       | 97.54        | 0.82           | 0.001 *                   | 0.038                    |
| Residuals                         | 22                      |              | 0.18           |                           |                          |
| Total                             | 23                      |              | 1.00           |                           |                          |

**Supplementary Table S3:** Ratio of different compounds in leaves, nectaries and nectar of *Pitcairnia* species separated by flower colour.

| Flower colour      | Tissue    | Reddish sepals & petals | Reddish bracts | Yellow/white sepals & petals | Greenish/white sepals & petals |
|--------------------|-----------|-------------------------|----------------|------------------------------|--------------------------------|
| Sugars/amino acids | Leaf      | 5.4 ± 4.0               | 4.6 ± 2.9      | 6.8 ± 7.5                    | 7.0 ± 1.7                      |
|                    | Nectaries | 5.9 ± 2.9               | 5.0 ± 3.6      | 3.8 ± 1.1                    | 7.5 ± 1.8                      |
|                    | Nectar    | 81.7 ± 112.7            | 244.1 ± 351.6  | 1076.8 ± 1018.0              | 759.8 ± 222.4                  |
| Sugars/inorg. ions | Leaf      | 0.1 ± 0.1               | 0.1 ± 0.1      | 0.1 ± 0.1                    | 0.4 ± 0.4                      |
|                    | Nectaries | 1.5 ± 1.0               | 1.2 ± 0.8      | 1.2 ± 0.8                    | 1.9 ± 0.6                      |
|                    | Nectar    | 166.3 ± 141.0           | 213.3 ± 161.1  | 99.5 ± 65.6                  | 80.0 ± 38.7                    |
